# Supplementary material
Source: publisher site journal article supplement (https://www.dovepress.com/article/584486)
Supplement: Supplementary file 1 [file 584486%20Revised%20appendix.docx]

Appendix Table A1. Minimum Sample Sizes required for each Non-Strabismic Binocular Vision Parameters.

| NSBV Parameter | Normative SD (±) | Allowable error (±) | Minimum sample size |
| --- | --- | --- | --- |
| Distance phoria | 1.32 | 0.10 | 670 |
| Near phoria | 4.24 | 0.25 | 1105 |
| Gradient AC/A | 1.50 | 0.10 | 864 |
| NFV break distance | 2.69 | 0.25 | 445 |
| NFV recovery distance | 2.33 | 0.25 | 334 |
| PFV break distance | 7.03 | 0.50 | 760 |
| PFV recovery distance | 5.35 | 0.50 | 439 |
| NFV break near | 4.96 | 0.50 | 378 |
| NFV recovery near | 3.82 | 0.25 | 897 |
| PFV break near | 6.6 | 0.50 | 670 |
| PFV recovery near | 6.44 | 0.50 | 637 |
| NPCbreak | 3.52 | 0.25 | 761 |
| Binocular accommodative facility | 4.41 | 0.25 | 1195 |
| Monocular accommodative facility | 5.33 | 0.50 | 436 |
| NRA | 0.29 | 0.02 | 517 |
| PRA | 0.72 | 0.05 | 797 |

NSBV=Non strabismic binocular vision, NPC= Near point of convergence, AC/A= Accommodative convergence to accommodation ratio, PFV= Positive fusional vergence, NFV= Negative fusional vergence, NRA= Negative relative accommodation, PRA= Positive relative accommodation

Appendix Table A2: Mean monocular amplitude of accommodation (AA) for ages

| Age (number) | Mean± SD | Hofstetter minimum AA |
| --- | --- | --- |
| 18(112) | 10.84 ± 1.24 | **10.50 D** |
| 19(103) | 10.57 ± 1.01 | **10.25 D** |
| 20(80) | 10.26 ± 0.35 | **10.00 D** |
| 21(64) | 9.95 ± 0.39 | **9.75 D** |
| 22(160) | 9.68 ± 0.37 | **9.50 D** |
| 23(80) | 9.38 ± 0.37 | **9.25 D** |
| 24(100) | 9.08 ± 0.82 | **9.00 D** |
| 25(84) | 8.77 ± 0.33 | **8.75 D** |
| 26(84) | 8.48 ± 0.33 | **8.50 D** |
| 27(81) | 8.16 ± 0.33 | **8.25 D** |
| 28(69) | 7.85 ± 0.35 | **8.00 D** |
| 29(74) | 7.52 ± 0.34 | **7.75 D** |
| 30(77) | 7.28 ± 0.34 | **7.50 D** |
| 31(70) | 7.02 ± 0.34 | **7.25 D** |
| 32(41) | 6.71 ± 0.36 | **7.00 D** |
| 33(40) | 6.44 ± 0.29 | **6.75 D** |
| 34(39) | 6.11 ± 0.30 | **6.50 D** |
| 35(35) | 5.81 ± 0.30 | **6.25 D** |

AA= Amplitude of accommodation
